# Supplementary material for: Consensus methods in patellofemoral pain: how rigorous are they? A scoping review
Source: PubMed Central journal article supplement (PMC11228197; doi:10.1136/bjsports-2023-107552), 2024-05-22
Supplement: bjsports-2023-107552supp001.pdf [file bjsports-2023-107552supp001.pdf]

## Appendices

### Appendix A - Literature search

#### A.1 Searches for Embase

Embase <1974 to 2022 May 3>

|    |                                                                                                                                                                                                                                      |        |
|----|--------------------------------------------------------------------------------------------------------------------------------------------------------------------------------------------------------------------------------------|--------|
| 1  | patellofemoral pain syndrome/                                                                                                                                                                                                        | 1646   |
| 2  | (patellofemoral adj3 pain*).mp. [mp=title, abstract, heading word, drug trade name, original title, device manufacturer, drug manufacturer, device trade name, keyword heading word, floating subheading word, candidate term word]  | 2895   |
| 3  | (patellar femoral adj3 pain).mp. [mp=title, abstract, heading word, drug trade name, original title, device manufacturer, drug manufacturer, device trade name, keyword heading word, floating subheading word, candidate term word] | 7      |
| 4  | PFPS.mp.                                                                                                                                                                                                                             | 677    |
| 5  | Anterior knee pain.mp.                                                                                                                                                                                                               | 2520   |
| 6  | patella chondromalacia/                                                                                                                                                                                                              | 827    |
| 7  | chondromalacia patellae.mp.                                                                                                                                                                                                          | 374    |
| 8  | Sinding larsen johansson.mp.                                                                                                                                                                                                         | 79     |
| 9  | runners knee.mp.                                                                                                                                                                                                                     | 33     |
| 10 | plica syndrome.mp.                                                                                                                                                                                                                   | 168    |
| 11 | 1 or 2 or 3 or 4 or 5 or 6 or 7 or 8 or 9 or 10                                                                                                                                                                                      | 6018   |
| 12 | consensus/ or consensus development/                                                                                                                                                                                                 | 111133 |
| 13 | (consensus adj3 (statement or guideline)).mp. [mp=title, abstract, heading word, drug trade name, original title, device manufacturer, drug manufacturer, device                                                                     | 10677  |

|    |                                                                                                                                                                                                                                                  |        |
|----|--------------------------------------------------------------------------------------------------------------------------------------------------------------------------------------------------------------------------------------------------|--------|
|    | trade name, keyword heading word, floating subheading word, candidate term word]                                                                                                                                                                 |        |
| 14 | (position adj3 (statement or guideline)).mp. [mp=title, abstract, heading word, drug trade name, original title, device manufacturer, drug manufacturer, device trade name, keyword heading word, floating subheading word, candidate term word] | 5297   |
| 15 | practice guideline/                                                                                                                                                                                                                              | 495491 |
| 16 | clinical practice guideline.mp.                                                                                                                                                                                                                  | 6414   |
| 17 | *health care policy/                                                                                                                                                                                                                             | 71057  |
| 18 | policy paper.mp.                                                                                                                                                                                                                                 | 154    |
| 19 | 12 or 13 or 14 or 15 or 16 or 17 or 18                                                                                                                                                                                                           | 665891 |
| 20 | 11 and 19                                                                                                                                                                                                                                        | 92     |

## A.2 Search strategy for Medline via Ovid

### Ovid MEDLINE(R) and Epub Ahead of Print, In-Process, In-Data-Review & Other Non-Indexed Citations, Daily and Versions <1946 to May 04, 2022>

|    |                                                                                                                                                                                                                                                                                                                                          |              |
|----|------------------------------------------------------------------------------------------------------------------------------------------------------------------------------------------------------------------------------------------------------------------------------------------------------------------------------------------|--------------|
| 1  | Patellofemoral Pain Syndrome/                                                                                                                                                                                                                                                                                                            | <b>1082</b>  |
| 2  | (patellofemoral adj3 (pain or syndrome)).mp. [mp=title, abstract, original title, name of substance word, subject heading word, floating sub-heading word, keyword heading word, organism supplementary concept word, protocol supplementary concept word, rare disease supplementary concept word, unique identifier, synonyms]         | <b>2290</b>  |
| 3  | (patellar femoral adj3 (pain or syndrome)).mp. [mp=title, abstract, original title, name of substance word, subject heading word, floating sub-heading word, keyword heading word, organism supplementary concept word, protocol supplementary concept word, rare disease supplementary concept word, unique identifier, synonyms]       | <b>3</b>     |
| 4  | PFPS.mp.                                                                                                                                                                                                                                                                                                                                 | <b>533</b>   |
| 5  | anterior knee pain.mp.                                                                                                                                                                                                                                                                                                                   | <b>2044</b>  |
| 6  | Chondromalacia Patellae/                                                                                                                                                                                                                                                                                                                 | <b>96</b>    |
| 7  | Sinding larsen johansson.mp.                                                                                                                                                                                                                                                                                                             | <b>43</b>    |
| 8  | runner* knee.mp.                                                                                                                                                                                                                                                                                                                         | <b>29</b>    |
| 9  | plica syndrome.mp.                                                                                                                                                                                                                                                                                                                       | <b>119</b>   |
| 10 | 1 or 2 or 3 or 4 or 5 or 6 or 7 or 8 or 9                                                                                                                                                                                                                                                                                                | <b>4228</b>  |
| 11 | Consensus/                                                                                                                                                                                                                                                                                                                               | <b>18440</b> |
| 12 | Consensus Development Conference/                                                                                                                                                                                                                                                                                                        | <b>12306</b> |
| 13 | Consensus Development Conference, NIH/                                                                                                                                                                                                                                                                                                   | <b>801</b>   |
| 14 | (Consensus adj3 (statement or paper)).mp. [mp=title, abstract, original title, name of substance word, subject heading word, floating sub-heading word, keyword heading word, organism supplementary concept word, protocol supplementary concept word, rare disease supplementary concept word, unique identifier, synonyms]            | <b>7476</b>  |
| 15 | ((position or policy) adj3 (statement or paper)).mp. [mp=title, abstract, original title, name of substance word, subject heading word, floating sub-heading word, keyword heading word, organism supplementary concept word, protocol supplementary concept word, rare disease supplementary concept word, unique identifier, synonyms] | <b>11880</b> |
| 16 | Practice Guideline/                                                                                                                                                                                                                                                                                                                      | <b>29792</b> |
| 17 | practice guideline.mp.                                                                                                                                                                                                                                                                                                                   | <b>35320</b> |
| 18 | Declaration.mp.                                                                                                                                                                                                                                                                                                                          | <b>9682</b>  |
| 19 | 11 or 12 or 13 or 14 or 15 or 16 or 17 or 18                                                                                                                                                                                                                                                                                             | <b>84269</b> |

|    |           |           |
|----|-----------|-----------|
| 20 | 10 and 19 | <b>14</b> |
|----|-----------|-----------|

### A.3 Search strategy for CINAHL via EBSCOhost

Friday, February 17, 2023 5:09:29 AM

| #   | Query                                            | Limiters/Expanders            | Last Run Via                                                                                              | Results |
|-----|--------------------------------------------------|-------------------------------|-----------------------------------------------------------------------------------------------------------|---------|
| S20 | S11 AND S19                                      | Search modes - Boolean/Phrase | Interface - EBSCOhost Research Databases<br>Search Screen - Advanced Search<br>Database - CINAHL Complete | 41      |
| S19 | S12 OR S13 OR S14 OR S15 OR S16 OR S17<br>OR S18 | Search modes - Boolean/Phrase | Interface - EBSCOhost Research Databases<br>Search Screen - Advanced Search<br>Database - CINAHL Complete | 106,124 |
| S18 | "policy statement"                               | Search modes - Boolean/Phrase | Interface - EBSCOhost Research Databases<br>Search Screen - Advanced Search<br>Database - CINAHL Complete | 1,158   |
| S17 | "position paper"                                 | Search modes - Boolean/Phrase | Interface - EBSCOhost Research Databases<br>Search Screen - Advanced Search<br>Database - CINAHL Complete | 1,976   |
| S16 | "position statement"                             | Search modes - Boolean/Phrase | Interface - EBSCOhost Research Databases                                                                  | 3,569   |

|     |                                                              |                               |                                          |        |
|-----|--------------------------------------------------------------|-------------------------------|------------------------------------------|--------|
|     |                                                              |                               | Search Screen - Advanced Search          |        |
|     |                                                              |                               | Database - CINAHL Complete               |        |
| S15 | (MH "Practice Guidelines")                                   | Search modes - Boolean/Phrase | Interface - EBSCOhost Research Databases | 86,325 |
|     |                                                              |                               | Search Screen - Advanced Search          |        |
|     |                                                              |                               | Database - CINAHL Complete               |        |
| S14 | "consensus statement"                                        | Search modes - Boolean/Phrase | Interface - EBSCOhost Research Databases | 2,665  |
|     |                                                              |                               | Search Screen - Advanced Search          |        |
|     |                                                              |                               | Database - CINAHL Complete               |        |
| S13 | (MH "Delphi Technique")                                      | Search modes - Boolean/Phrase | Interface - EBSCOhost Research Databases | 7,854  |
|     |                                                              |                               | Search Screen - Advanced Search          |        |
|     |                                                              |                               | Database - CINAHL Complete               |        |
| S12 | (MH "Consensus")                                             | Search modes - Boolean/Phrase | Interface - EBSCOhost Research Databases | 7,272  |
|     |                                                              |                               | Search Screen - Advanced Search          |        |
|     |                                                              |                               | Database - CINAHL Complete               |        |
| S11 | S1 OR S2 OR S3 OR S4 OR S5 OR S6 OR S7<br>OR S8 OR S9 OR S10 | Search modes - Boolean/Phrase | Interface - EBSCOhost Research Databases | 5,741  |
|     |                                                              |                               | Search Screen - Advanced Search          |        |
|     |                                                              |                               | Database - CINAHL Complete               |        |
| S10 | (MH "Plica Syndrome")                                        | Search modes - Boolean/Phrase | Interface - EBSCOhost Research Databases | 18     |
|     |                                                              |                               | Search Screen - Advanced Search          |        |

|    |                                          |                                 |                                          |       |
|----|------------------------------------------|---------------------------------|------------------------------------------|-------|
|    |                                          | Database - CINAHL Complete      |                                          |       |
| S9 | "runners knee"                           | Search modes - Boolean/Phrase   | Interface - EBSCOhost Research Databases | 3     |
|    |                                          | Search Screen - Advanced Search |                                          |       |
|    |                                          | Database - CINAHL Complete      |                                          |       |
| S8 | (MH "Sinding-Larsen-Johansson Syndrome") | Search modes - Boolean/Phrase   | Interface - EBSCOhost Research Databases | 18    |
|    |                                          | Search Screen - Advanced Search |                                          |       |
|    |                                          | Database - CINAHL Complete      |                                          |       |
| S7 | (MH "Chondromalacia Patella")            | Search modes - Boolean/Phrase   | Interface - EBSCOhost Research Databases | 99    |
|    |                                          | Search Screen - Advanced Search |                                          |       |
|    |                                          | Database - CINAHL Complete      |                                          |       |
| S6 | "anterior knee pain"                     | Search modes - Boolean/Phrase   | Interface - EBSCOhost Research Databases | 1,101 |
|    |                                          | Search Screen - Advanced Search |                                          |       |
|    |                                          | Database - CINAHL Complete      |                                          |       |
| S5 | "PFPS"                                   | Search modes - Boolean/Phrase   | Interface - EBSCOhost Research Databases | 378   |
|    |                                          | Search Screen - Advanced Search |                                          |       |
|    |                                          | Database - CINAHL Complete      |                                          |       |
| S4 | "patellar femoral pain"                  | Search modes - Boolean/Phrase   | Interface - EBSCOhost Research Databases | 3     |
|    |                                          | Search Screen - Advanced Search |                                          |       |
|    |                                          | Database - CINAHL Complete      |                                          |       |

|    |                                     |                                                                                                |                                          |       |
|----|-------------------------------------|------------------------------------------------------------------------------------------------|------------------------------------------|-------|
| S3 | (MM "Patellofemoral Pain Syndrome") | Search modes - Boolean/Phrase<br>Search Screen - Advanced Search<br>Database - CINAHL Complete | Interface - EBSCOhost Research Databases | 1,481 |
| S2 | patellofemoral pain                 | Search modes - Boolean/Phrase<br>Search Screen - Advanced Search<br>Database - CINAHL Complete | Interface - EBSCOhost Research Databases | 2,292 |
| S1 | patellofemoral                      | Search modes - Boolean/Phrase<br>Search Screen - Advanced Search                               | Interface - EBSCOhost Research Databases | 4,991 |

#### A.4 Search strategy for SPORTDiscus via EBSCOhost

Thursday, May 05, 2022 6:16:12 PM

| #   | Query                                                               | Limiters/Expanders            | Last Run Via                                                                                              | Results |
|-----|---------------------------------------------------------------------|-------------------------------|-----------------------------------------------------------------------------------------------------------|---------|
| S18 | (s10 or s11 or s12 or s13 or s14 or s15 or s16)<br>AND (S9 AND S17) | Search modes - Boolean/Phrase | Interface - EBSCOhost Research Databases<br>Search Screen - Advanced Search<br>Database - CINAHL Complete | 63      |

|     |                                               |                               |                                                                                                           |         |
|-----|-----------------------------------------------|-------------------------------|-----------------------------------------------------------------------------------------------------------|---------|
| S17 | s10 or s11 or s12 or s13 or s14 or s15 or s16 | Search modes - Boolean/Phrase | Interface - EBSCOhost Research Databases<br>Search Screen - Advanced Search<br>Database - CINAHL Complete | 159,590 |
| S16 | policy paper                                  | Search modes - Boolean/Phrase | Interface - EBSCOhost Research Databases<br>Search Screen - Advanced Search<br>Database - CINAHL Complete | 2,361   |
| S15 | position paper                                | Search modes - Boolean/Phrase | Interface - EBSCOhost Research Databases<br>Search Screen - Advanced Search<br>Database - CINAHL Complete | 2,587   |
| S14 | position statement                            | Search modes - Boolean/Phrase | Interface - EBSCOhost Research Databases<br>Search Screen - Advanced Search<br>Database - CINAHL Complete | 4,267   |
| S13 | practice guidelines                           | Search modes - Boolean/Phrase | Interface - EBSCOhost Research Databases<br>Search Screen - Advanced Search<br>Database - CINAHL Complete | 101,391 |
| S12 | clinical practice guidelines                  | Search modes - Boolean/Phrase | Interface - EBSCOhost Research Databases<br>Search Screen - Advanced Search<br>Database - CINAHL Complete | 12,550  |
| S11 | consensus statement                           | Search modes - Boolean/Phrase | Interface - EBSCOhost Research Databases<br>Search Screen - Advanced Search                               | 4,051   |



|     |                                                |                               |                                          |        |
|-----|------------------------------------------------|-------------------------------|------------------------------------------|--------|
|     |                                                |                               | Database - CINAHL Complete               |        |
| S10 | consensus                                      | Search modes - Boolean/Phrase | Interface - EBSCOhost Research Databases | 55,743 |
|     |                                                |                               | Search Screen - Advanced Search          |        |
|     |                                                |                               | Database - CINAHL Complete               |        |
| S9  | (S1 OR S2 OR S3 OR S4 OR S5 OR S6 OR S7 OR S8) | Search modes - Boolean/Phrase | Interface - EBSCOhost Research Databases | 6,099  |
|     |                                                |                               | Search Screen - Advanced Search          |        |
|     |                                                |                               | Database - CINAHL Complete               |        |
| S8  | plica syndrome                                 | Search modes - Boolean/Phrase | Interface - EBSCOhost Research Databases | 46     |
|     |                                                |                               | Search Screen - Advanced Search          |        |
|     |                                                |                               | Database - CINAHL Complete               |        |
| S7  | runners knee                                   | Search modes - Boolean/Phrase | Interface - EBSCOhost Research Databases | 196    |
|     |                                                |                               | Search Screen - Advanced Search          |        |
|     |                                                |                               | Database - CINAHL Complete               |        |
| S6  | sinding-larsen-johansson syndrome              | Search modes - Boolean/Phrase | Interface - EBSCOhost Research Databases | 23     |
|     |                                                |                               | Search Screen - Advanced Search          |        |
|     |                                                |                               | Database - CINAHL Complete               |        |
| S5  | anterior knee pain                             | Search modes - Boolean/Phrase | Interface - EBSCOhost Research Databases | 1,187  |

|    |                       |                               |                                          |       |
|----|-----------------------|-------------------------------|------------------------------------------|-------|
| S4 | pfps                  | Search modes - Boolean/Phrase | Search Screen - Advanced Search          | 915   |
|    |                       |                               | Database - CINAHL Complete               |       |
| S3 | patellar femoral pain | Search modes - Boolean/Phrase | Interface - EBSCOhost Research Databases | 11    |
|    |                       |                               | Search Screen - Advanced Search          |       |
| S2 | patellofemoral pain   | Search modes - Boolean/Phrase | Database - CINAHL Complete               | 2,292 |
|    |                       |                               | Interface - EBSCOhost Research Databases |       |
| S1 | patellofemoral        | Search modes - Boolean/Phrase | Search Screen - Advanced Search          | 4,991 |
|    |                       |                               | Database - CINAHL Complete               |       |

## A.5 Search strategy for records from grey literature

### Website Browsing Documentation:

| <b>Date</b> | <b>Organization name</b>                              | <b>URL</b>                                                                                                                                 | <b># of items screened (uploaded to citation management software)</b> |
|-------------|-------------------------------------------------------|--------------------------------------------------------------------------------------------------------------------------------------------|-----------------------------------------------------------------------|
|             | <i>Ex. Public Health Ontario</i>                      | <i>Ex. <a href="https://www.publichealthontario.ca/en/Pages/default.aspx">https://www.publichealthontario.ca/en/Pages/default.aspx</a></i> | <i>Ex. 3</i>                                                          |
| 3-May-2022  | OARSI (Osteoarthritis Research International) website | <a href="https://oarsi.org/">https://oarsi.org/</a> searching “consensus” and “guidelines”                                                 | 1 (McAlindon et al, 2014)                                             |
| 3-May-2022  | Patellofemoral.org                                    | <a href="https://patellofemoral.org/about/">https://patellofemoral.org/about/</a>                                                          | 0                                                                     |
| 3-May-2022  | ISAKOS                                                | <a href="https://www.isakos.com/">https://www.isakos.com/</a>                                                                              | 0                                                                     |
| 3-May-2022  | International Patellofemoral Research Network website | <a href="https://ipfrn.org/about/">https://ipfrn.org/about/</a>                                                                            | 0                                                                     |
| 3-May-2022  | American Orthopaedic Society for Sports Medicine      | <a href="https://www.sportsmed.org/">https://www.sportsmed.org/</a>                                                                        | 0                                                                     |

**Website Searching Documentation:**

| Date       | Organization name & website<br><br>URL<br><br><i>Ex. Healthy Ontario &amp;<br/>http://www.behealthyontario.com/</i> | Search strategy(s)/ words searched including<br><br>(if applicable) how items were selected.<br><br><i>Ex. Used Advanced Google site/domain search</i><br><br><i>Search strategies:</i><br><br><i>1) Wind turbines and sleep</i><br><br><i>2) Wind-powered electrical generators and sleep</i><br><br><i>Selection:</i><br><br><i>All items retrieved in with each search were reviewed for<br/>relevance by 1 reviewer.</i> | # items<br><br>retrieved/<br><br>search results<br><br><i>Ex. Search Results:</i><br><br><i>1) 18</i><br><i>2) 15</i> | # of items<br><br>screened<br><br>(uploaded to<br><br>citation<br><br>management<br><br>software)<br><br><i>Ex. Items Screened:</i><br><br><i>1) 3</i><br><i>2) 2</i> |
|------------|---------------------------------------------------------------------------------------------------------------------|------------------------------------------------------------------------------------------------------------------------------------------------------------------------------------------------------------------------------------------------------------------------------------------------------------------------------------------------------------------------------------------------------------------------------|-----------------------------------------------------------------------------------------------------------------------|-----------------------------------------------------------------------------------------------------------------------------------------------------------------------|
| 3-May-2022 | <b>Google Scholar (Canada)</b>                                                                                      | Patellofemoral AND consensus<br><br>Patellofemoral AND Guideline                                                                                                                                                                                                                                                                                                                                                             | 1) 100<br>(first ten<br>pages)<br>2) 100<br>(first ten<br>pages)                                                      | 1) 2 (Davis et<br>al, 2010 &<br>Powers et al<br>2012)<br>2) 2 (Bailey et<br>al, 2021 &<br>Geierlehner,<br>et al 2020)                                                 |
| 3-May-2022 | <b>TRIP Database</b>                                                                                                | Patellofemoral consensus<br><br>Patellofemoral guidelines                                                                                                                                                                                                                                                                                                                                                                    | 1) 128<br>2) 52                                                                                                       | 1) 0<br>2) 0                                                                                                                                                          |
| 3-May-2022 | <b>Guidelines International<br/>Database (GIN)</b>                                                                  | “Patellofemoral”<br><br>“Knee”<br><br>“Anterior knee”                                                                                                                                                                                                                                                                                                                                                                        | 1) 0<br>2) 23<br>3) 1<br>4) 0<br>5) 1<br>6) 0                                                                         | 1) 0<br>2) 0<br>3) 0<br>4) 0<br>5) 0<br>6) 0                                                                                                                          |

|            |                         |                  |       |                        |
|------------|-------------------------|------------------|-------|------------------------|
|            |                         | “Chondromalacia” | 7) 0  | 7) 0                   |
|            |                         | “Patella”        |       |                        |
|            |                         | “PFPS”           |       |                        |
|            |                         | “Runners Knee”   |       |                        |
| 3-May-2022 | <b>CPG Infobase</b>     | “Patellofemoral” | 1) 0  | 1) 0                   |
|            |                         |                  | 2) 22 | 2) 0                   |
|            |                         | “Knee”           | 3) 0  | 3) 0                   |
|            |                         |                  | 4) 0  | 4) 0                   |
|            |                         | “Anterior knee”  | 5) 0  | 5) 0                   |
|            |                         |                  | 6) 0  | 6) 0                   |
|            |                         | “Chondromalacia” | 7) 0  | 7) 0                   |
|            |                         | “Patella”        |       |                        |
|            |                         | “PFPS”           |       |                        |
|            |                         | “Runners Knee”   |       |                        |
| 3-May-2022 | <b>Clinical Key (1)</b> | “Patellofemoral” | 1) 6  | 1) 1 (Fox et al, 2018) |
|            |                         | “knee”           |       | 2) 0                   |
|            |                         |                  | 2) 57 | 3) 0                   |
|            |                         | “Kneecap”        | 3) 13 | 4) 0                   |
|            |                         |                  | 4) 3  | 5) 0                   |
|            |                         | “Anterior knee”  | 5) 0  | 6) 0                   |
|            |                         |                  | 6) 13 | 7) 0                   |
|            |                         | “Chondromalacia” | 7) 2  | 8) 0                   |
|            |                         |                  | 8) 4  |                        |

|  |  |                |  |  |
|--|--|----------------|--|--|
|  |  | “Patella”      |  |  |
|  |  | “PFPS”         |  |  |
|  |  | “Runners Knee” |  |  |

### Strategy 2. Grey Literature Database Search

| <b>Date</b> | <b>Database name &amp; URL</b>                                           | <b>Search strategy(s)/ words searched including (if applicable) how items were selected.</b>                                                                                                                                                                            | <b># of items retrieved/ search results</b>  | <b># of items screened (uploaded to citation management software)</b> |
|-------------|--------------------------------------------------------------------------|-------------------------------------------------------------------------------------------------------------------------------------------------------------------------------------------------------------------------------------------------------------------------|----------------------------------------------|-----------------------------------------------------------------------|
|             | <i>Ex. ClinicalTrials.Gov</i><br>&<br><i>https://clinicaltrials.gov/</i> | <i>Ex. Search strategies:</i><br>1) <i>Alzheimer’s Disease and Canada.</i><br>2) <i>Alzheimer Disease and Canada</i><br><i>Selection:</i><br><i>All results retrieved in the search were reviewed for relevance by 1 reviewer, 3 items were selected for screening.</i> | <i>Ex. Search Results:</i><br>1) 181<br>2) 3 | <i>Ex. Items Screened:</i><br>1) 3<br>2) 0                            |
| 3-May-2022  | Networked Digital Library of Theses and Dissertations (NDLTD)            | 1) Consensus AND patellofemoral<br>2) Guideline AND patellofemoral                                                                                                                                                                                                      | 1) 5<br>2) 6                                 | 1) 0<br>2) 0                                                          |

|            |                                                                            |                                                                    |                   |                                               |
|------------|----------------------------------------------------------------------------|--------------------------------------------------------------------|-------------------|-----------------------------------------------|
|            | 'Global ETD Search'                                                        |                                                                    |                   |                                               |
| 3-May-2022 | ProQuest<br>Dissertations &<br>Theses Global                               | 1) Consensus AND patellofemoral<br>2) Guideline AND patellofemoral | 1) 887<br>2) 1305 | 1) 0<br>2) 1<br>(Guanghua,<br>Chinese<br>CPG) |
| 3-May-2022 | Center for Research<br>Libraries (CRL)<br>Foreign Dissertation<br>Database | 1) Consensus AND patellofemoral<br>2) Guideline AND patellofemoral | 1) 86<br>2) 27    | 1) 0<br>2) 0                                  |

**Strategy 3. Search Engine Searching (Google.ca, [DuckDuckGo.com](https://duckduckgo.com))**

| <b>Date</b> | <b>Search engine</b> | <b>Search strategy(s) including how items were selected</b>                                                                                                                                                                  | <b># of items screened<br/>(uploaded to citation management software)</b> |
|-------------|----------------------|------------------------------------------------------------------------------------------------------------------------------------------------------------------------------------------------------------------------------|---------------------------------------------------------------------------|
|             | <i>Ex. Google.ca</i> | <i>Ex. Search strategies:</i><br>1) <i>Wind turbines and sleep</i><br>2) <i>Wind-powered electrical generators and sleep</i><br><br><i>Selection: Items were selected by scanning the first 100 results from each search</i> | <i>Ex. Items Screened:</i><br>1) 3<br>2) 2                                |
| 3-May-2022  | Google.ca            | Intitle: 'Patellofemoral AND Consensus'<br><br>Intitle: 'Patellofemoral AND Guideline'                                                                                                                                       | 1) 9 (1 - Anand et al, 2022)<br>1) 9                                      |

#### Strategy 4. Contact Knowledge Experts

| <b>Name of individual or listserv</b> | <b>Date contacted (follow up dates if necessary)</b> | <b># of items recommended</b> | <b># of items identified for full screening<br/>(uploaded to citation management software)</b> |
|---------------------------------------|------------------------------------------------------|-------------------------------|------------------------------------------------------------------------------------------------|
| Kay Crossley                          | July 2021                                            | 9                             | 9 – IPRN consensus statements                                                                  |



This template was originally created by Jackie Stapleton and is based on the methods outlined in the article: Godin, K., Stapleton, J., Kirkpatrick, S. I., Hanning, R. M., & Leatherdale, S. T. (2015). Applying systematic review search methods to the grey literature: a case study examining guidelines for school-based breakfast programs in Canada. *Systematic reviews*, 4(1), 138. [DOI: 10.1186/s13643-015-0125-0](https://doi.org/10.1186/s13643-015-0125-0)

**Appendix B - Data extraction headings as utilized in Microsoft Excel.**

|                                                   |                                                                    |                                                     |                                |                                                                                      |                             |                               |                                     |                                                |                                                             |                            |
|---------------------------------------------------|--------------------------------------------------------------------|-----------------------------------------------------|--------------------------------|--------------------------------------------------------------------------------------|-----------------------------|-------------------------------|-------------------------------------|------------------------------------------------|-------------------------------------------------------------|----------------------------|
| Title                                             | First Author                                                       | Year Published                                      | Years since previous iteration | Aim of the consensus stated? (Rx recommendation, Definitions, Priority setting, etc) | No of panelists/experts     | Experience of panelists (yrs) | <b>Expertise defined as...</b>      | Was inclusion criteria for panelists explicit? | <i>If inclusion criteria was included please list here.</i> | What was the gender split? |
| How many countries were represented on the panel? | Were low / lower-middle income countries represented on the panel? | Did panelists remain same?                          | Participant groups included    | <b>Was Stakeholder analysis completed?</b>                                           | Were questions SR-informed? | Were the questions explicit?  | What consensus method was reported? | Which method of consensus was used?            |                                                             |                            |
| Was consensus level decided apriori?              | What was the method or level of agreement set at?                  | Were dissenting opinions acknowledged and reported? | Scientometric impact to date?  | Has the statement had any impact on Policy?                                          | Funding / Col               |                               |                                     |                                                |                                                             |                            |

**Appendix C - Excluded studies with reasons**

| Title                                                                                                                                                                                                                            | 1st Author   | Exclusion Reasons                        |
|----------------------------------------------------------------------------------------------------------------------------------------------------------------------------------------------------------------------------------|--------------|------------------------------------------|
| Philadelphia Panel Evidence-Based Clinical Practice Guidelines on Selected Rehabilitation Interventions for Knee Pain                                                                                                            | Albright, J. | No consensus process;                    |
| The 'Best Practice Guide to Conservative Management of Patellofemoral Pain': incorporating level 1 evidence with expert clinical reasoning                                                                                       | Barton, CJ   | No consensus process                     |
| National Athletic Trainers' Association Position Statement: Management of Individuals With Patellofemoral Pain                                                                                                                   | Bolgia, LA   | No consensus process (authors confirmed) |
| Patellofemoral arthroplasty in the athlete                                                                                                                                                                                       | Farr, J.     | No consensus process                     |
| Patellofemoral pain syndrome: a review and guidelines for treatment                                                                                                                                                              | Juhn, MS.    | No consensus process                     |
| Revision of the KNGF Guideline Osteoarthritis of the Hip and Knee                                                                                                                                                                | Peter, WFH.  | No consensus process                     |
| Patellofemoral Instability: A Consensus Statement From the AOSSM/PFF Patellofemoral Instability Workshop                                                                                                                         | Post, WR     | Focus is on patellofemoral instability   |
| Treatment of osteoarthritis of the knee (nonarthroplasty)                                                                                                                                                                        | Richmond, J. | No consensus process                     |
| Patellofemoral disorders: A classification system and clinical guidelines for nonoperative rehabilitation                                                                                                                        | Wilk, KE.    | No consensus process                     |
| Patellofemoral Pain: Clinical Practice Guidelines Linked to the International Classification of Functioning, Disability and Health From the Academy of Orthopaedic Physical Therapy of the American Physical Therapy Association | Willy, RW.   | No consensus process                     |
| Clinical classification of patellofemoral pain syndrome: Guidelines for non-operative treatment                                                                                                                                  | Witvrouw, E. | No consensus process                     |
| MANAGEMENT OF FIRST-TIME PATELLAR DISLOCATION: A SURVEY OF PRISM MEMBERS                                                                                                                                                         | Parikh SN    | Patellofemoral instability focus         |
| Development of a return to play checklist following patellar instability surgery: a Delphi-based consensus                                                                                                                       | White AE     | Patellofemoral instability focus         |
| Consensus guidelines for management of patellofemoral instability                                                                                                                                                                | Bailey MEA   | Patellofemoral instability focus         |

|                                                                                                                                                       |                 |                                                 |
|-------------------------------------------------------------------------------------------------------------------------------------------------------|-----------------|-------------------------------------------------|
| Patellar Instability Management A Survey of the International Patellofemoral Study Group                                                              | Liu JN          | Patellofemoral instability focus                |
| Patellofemoral Instability: A Consensus Statement From the AOSSM/PFF Patellofemoral Instability Workshop                                              | Post WR         | Duplicate: Patellofemoral instability focus     |
| Recent advances and future trends in patellofemoral instability                                                                                       | Anand, BS       | No consensus & Patellofemoral instability focus |
| Patellofemoral Pain Syndrome: Proximal, Distal, and Local Factors—An International Research Retreat: April 30–May 2, 2009, Fells Point, Baltimore, MD | Davis, I.       | Duplicate                                       |
| Patellofemoral Pain: Proximal, Distal, and Local Factors—Second International Research Retreat, August 31–September 2, 2011, Ghent, Belgium           | Powers, C.      | Duplicate                                       |
| ACR Appropriateness Criteria(®) Chronic Knee Pain                                                                                                     | Fox, MG.        | Duplicate                                       |
| Prevailing disagreement in the treatment of complex patellar instability cases: an online expert survey of the AGA Knee–Patellofemoral Committee      | Geierlehner, A. | Patellar instability focus                      |
