# Supplementary material for: Consensus methods in patellofemoral pain: how rigorous are they? A scoping review
Source: PubMed Central journal article supplement (PMC11228197; doi:10.1136/bjsports-2023-107552), 2024-05-22
Supplement: bjsports-2023-107552supp002.pdf [file bjsports-2023-107552supp002.pdf]

**Table 2. Characteristics of included consensus statements**

| Title                                                                                                                                                 | First Author   | Year Published | Years since previous iteration | Stated aim of the consensus process (E.g. treatment recommendation, develop definitions, priority setting exercise, etc)                                                                                                                      |
|-------------------------------------------------------------------------------------------------------------------------------------------------------|----------------|----------------|--------------------------------|-----------------------------------------------------------------------------------------------------------------------------------------------------------------------------------------------------------------------------------------------|
| Selected issues for the adolescent athlete and the team physician: A consensus statement                                                              | Herring(26)    | 2008           | n/a                            | Help the team physician improve the care of the adolescent athlete by understanding the medical, musculoskeletal (shoulder/knee- <b>including PFP</b> /elbow/spine), and psychological issues (sport specialization) common in this age group |
| Patellofemoral Pain Syndrome: Proximal, Distal, and Local Factors—An International Research Retreat: April 30–May 2, 2009, Fells Point, Baltimore, MD | Davis(11)      | 2010           | n/a                            | Unclear - presentation of research and some future research recommendations                                                                                                                                                                   |
| Patellofemoral Pain: Proximal, Distal, and Local Factors—Second International Research Retreat, August 31–September 2, 2011, Ghent, Belgium           | Powers(27)     | 2012           | 2                              | To understand the factors that contribute to the development and, consequently the treatment of PFP                                                                                                                                           |
| Patellofemoral pain: consensus statement from the 3rd International Patellofemoral Pain Research Retreat held in Vancouver, September 2013            | Witvrouw(28)   | 2014           | 2                              | Gain consensus for three specific areas:<br>1. The natural history of PFP and local (knee region) factors that influence PFP;<br>2. Trunk and distal factors that influence PFP; and<br>3. Innovations in rehabilitation for PFP              |
| 2014 OARSI guidelines for the non-surgical management of knee osteoarthritis                                                                          | McAlindon (29) | 2014           | 6                              | To develop concise, up-to-date, patient-focused, evidence-based, expert consensus guidelines for the management of knee osteoarthritis (OA) *including patellofemoral osteoarthritis*                                                         |
| 2016 Patellofemoral pain consensus statement from the 4th International Patellofemoral Pain Research Retreat, Manchester. Part 1: Terminology,        | Crossley(30)   | 2016a          | 2                              | To agree on: Terminology, Definitions, Clinical Examination, Natural History, and PROMs (patient reported outcome measures)                                                                                                                   |

definitions, clinical examination, natural history, patellofemoral osteoarthritis and patient-reported outcome measures

|                                                                                                                                                                                                                                            |                    |       |     |                                                                                                                                                                           |
|--------------------------------------------------------------------------------------------------------------------------------------------------------------------------------------------------------------------------------------------|--------------------|-------|-----|---------------------------------------------------------------------------------------------------------------------------------------------------------------------------|
| 2016 Patellofemoral pain consensus statement from the 4th International Patellofemoral Pain Research Retreat, Manchester. Part 2: recommended physical interventions (exercise, taping, bracing, foot orthoses and combined interventions) | Crossley(31)       | 2016b | 2   | To agree on expert recommended physical interventions for PFP                                                                                                             |
| Selected issues in injury and illness prevention and the team physician: A consensus statement                                                                                                                                             | Herring(32)        | 2016  | 0   | To help the team physician improve the care of the athlete by understanding and practicing methods of injury and illness prevention in specific sports medicine problems. |
| Evidence-based framework for a pathomechanical model of patellofemoral pain: 2017 patellofemoral pain consensus statement from the 4th International Patellofemoral Pain Research Retreat, Manchester, UK: part 3                          | Powers(33)         | 2017  | 2   | To place known associated factors within the context of a patho-mechanical model of PFP                                                                                   |
| Female Athlete Issues for the Team Physician: A Consensus Statement--2017 Update                                                                                                                                                           | Herring(34)        | 2018  | n/a | To improve the care of the female athletes by understanding select injuries and illnesses                                                                                 |
| International patellofemoral osteoarthritis consortium: Consensus statement on the diagnosis, burden, outcome measures, prognosis, risk factors and treatment                                                                              | Van Middlekoop(35) | 2018  | n/a | Mixed consensus on: diagnosis; burden; PROMs; Prognosis; Risk Factors; and Treatment.<br><br>Adds in a priority setting process.                                          |
| 2018 Consensus statement on exercise therapy and physical interventions (orthoses, taping and manual therapy) to treat patellofemoral pain: recommendations from the 5th International Patellofemoral Pain                                 | Collins(36)        | 2018  | 2   | To agree on expert recommended physical interventions for PFP                                                                                                             |

Research Retreat, Gold Coast, Australia,  
2017

|                                                                                                                                      |                |      |     |                                                                                                                                                                                                                                                                                       |
|--------------------------------------------------------------------------------------------------------------------------------------|----------------|------|-----|---------------------------------------------------------------------------------------------------------------------------------------------------------------------------------------------------------------------------------------------------------------------------------------|
| The Diagnosis and Therapy of Degenerative Knee Joint Disease: Expert Consensus from the Chinese Pain Medicine Panel                  | Huang(37)      | 2018 | n/a | To formulate Chinese Pain Specialist Consensus on the diagnosis and treatment of degenerative knee osteoarthritis (DKOA)                                                                                                                                                              |
| ACR Appropriateness Criteria(®) Chronic Knee Pain                                                                                    | Fox(38)        | 2018 | n/a | To provide clinicians with the best practices for ordering imaging examinations                                                                                                                                                                                                       |
| Chinese Guidelines for Diagnosis and Treatment of Patellofemoral Osteoarthritis (2020 Edition)                                       | Guanghua(39)   | 2020 | n/a | Guidelines on the diagnosis and treatment of patellofemoral OA                                                                                                                                                                                                                        |
| An Expert Consensus Statement on the Management of Large Chondral and Osteochondral Defects in the Patellofemoral Joint              | Chahla(40)     | 2020 | na  | Consensus on the functional anatomy, indications, donor graft considerations, surgical treatment, and rehabilitation of large chondral and osteochondral defects in the patellofemoral joint                                                                                          |
| 2019 American College of Rheumatology/Arthritis Foundation Guideline for the Management of Osteoarthritis of the Hand, Hip, and Knee | Kolasinski(41) | 2020 | 8   | To develop an evidence-based guideline for the comprehensive management of osteoarthritis (OA) as a collaboration between the American College of Rheumatology (36) and the Arthritis Foundation, updating the 2012 ACR recommendations for the management of hand, hip, and knee OA. |
| Operative Treatment Options for Patellofemoral Arthritis: An Expert Recommendation of the AGA Patellofemoral Committee               | Keshmiri(42)   | 2021 | na  | Consensus on therapy for different patellofemoral abnormalities in patients suffering from isolated patellofemoral arthritis.                                                                                                                                                         |

|                                                                                                                                                                                       |               |      |    |                                                                                                                                                                                                                                                                    |
|---------------------------------------------------------------------------------------------------------------------------------------------------------------------------------------|---------------|------|----|--------------------------------------------------------------------------------------------------------------------------------------------------------------------------------------------------------------------------------------------------------------------|
| Community-based rehabilitation implementation framework to address PFP amongst runners in under-resourced communities: Delphi consensus                                               | Kunene(43)    | 2021 | na | To develop a community-based rehabilitation implementation framework for PFP in runners from under-resourced communities                                                                                                                                           |
| REPORT-PFP: a consensus from the International Patellofemoral Research Network to improve REPORTing of quantitative PatelloFemoral Pain studies                                       | Barton(44)    | 2021 | 3  | Consensus statement and associated checklist provides standards for REPORTing of quantitative PatelloFemoral Pain (REPORT-PFP) research to enhance clinical translation and evidence synthesis, and support clinician engagement with research and data collection |
| Expert consensus on surgical treatment of patellofemoral osteoarthritis                                                                                                               | Guanghua(45)  | 2021 | na | To summarize the latest research progress in the surgical treatment of patellofemoral osteoarthritis, and refer to the latest domestic and foreign guidelines and consensus                                                                                        |
| Developing Clinical and Research Priorities for Pain and Psychological Features in People With Patellofemoral Pain: An International Consensus Process With Health Care Professionals | Vicenzino(46) | 2022 | 3  | The objective of this consensus development process was to decide clinical and research priorities for pain features and psychological factors in persons with patellofemoral pain.                                                                                |
