# Supplementary material for: Consensus methods in patellofemoral pain: how rigorous are they? A scoping review
Source: PubMed Central journal article supplement (PMC11228197; doi:10.1136/bjsports-2023-107552), 2024-05-22
Supplement: bjsports-2023-107552supp003.pdf [file bjsports-2023-107552supp003.pdf]

**Table 3. Representativeness of the panels**

| <i>First Author</i>   | <i>No. panelists</i> | <i>Experience / definition of expertise</i> | <i>Inclusion criteria for panelists</i>                                                        | <i>Sex split</i> | <i>No. countries - represented</i>                                                         | <i>low / lower-middle income countries represented</i> | <i>Participant groups included</i>            |
|-----------------------|----------------------|---------------------------------------------|------------------------------------------------------------------------------------------------|------------------|--------------------------------------------------------------------------------------------|--------------------------------------------------------|-----------------------------------------------|
| <b>Herring (2008)</b> | 11                   | n/a                                         | Yes* (see key)                                                                                 | 7 male: 4 female | 1 - all situated in the USA                                                                | No                                                     | 10 MD***, 1 Doctor of Osteopathy              |
| <b>Davis (2010)</b>   | Unclear              | n/a                                         | Unclear - Had to be part of the PFP Research Retreat - unclear how involvement was facilitated | unclear          | 10 - (Australia, Belgium, Brazil, Canada, Israel, Italy, Netherlands, Singapore, UK, USA.) | No                                                     | Unclear (scientists, researchers, clinicians) |
| <b>Powers (2012)</b>  | Unclear              | n/a                                         | Unclear - Had to be part of the PFP Research Retreat - unclear how                             | unclear          | 9 - not reported which countries (Lead author from USA)                                    | Unclear                                                | Unclear (scientists, researchers, clinicians) |

|                         |              |     |                                                                                                                                                                  |                   |                                                                                           |         |                                                                                                                                                                       |
|-------------------------|--------------|-----|------------------------------------------------------------------------------------------------------------------------------------------------------------------|-------------------|-------------------------------------------------------------------------------------------|---------|-----------------------------------------------------------------------------------------------------------------------------------------------------------------------|
|                         |              |     | involvement was facilitated                                                                                                                                      |                   |                                                                                           |         |                                                                                                                                                                       |
| <b>Witvrouw (2014)</b>  | Not reported | n/a | Unclear - Had to be part of the PFP Research Retreat - unclear how involvement was facilitated                                                                   | unclear           | not reported (Authors from Qatar, Belgium, UK, USA, and Australia)                        | Unclear | Unclear (scientists, researchers, clinicians)                                                                                                                         |
| <b>McAlindon (2014)</b> | 13           | n/a | Yes - "expert panel was composed of 13 voting members and a patient advocate. This group was selected for its diverse expertise and experience in OA management" | 10 male: 3 female | 10 (USA, UK, France, Netherlands, Belgium, Sweden, Denmark, Australia, Japan, and Canada) | No      | Medical disciplines (primary care, rheumatology, orthopedics, physical therapy, physical medicine and rehabilitation, and evidence-based medicine) & <b>1 patient</b> |

|                             |              |     |                                                                                                |                  |                                                                    |         |                                                                                                      |
|-----------------------------|--------------|-----|------------------------------------------------------------------------------------------------|------------------|--------------------------------------------------------------------|---------|------------------------------------------------------------------------------------------------------|
| <b>Crossley<br/>(2016a)</b> | Not reported | n/a | No - mention of 'whole group discussion to facilitate consensus'                               | unclear          | not reported (authors from Australia, UK, USA, and Canada)         | Unclear | Unclear                                                                                              |
| <b>Crossley<br/>(2016b)</b> | 35           | n/a | Unclear - Had to be part of the PFP Research Retreat - unclear how involvement was facilitated | unclear          | not reported (authors from Australia, Netherlands, UK and Denmark) | Unclear | Six groups: Physiotherapists; MD; Podiatrists; Biomechanists; Epidemiologists; and Sports Therapists |
| <b>Herring<br/>(2016)</b>   | 12           | n/a | <b>Yes* (see key)</b>                                                                          | 10 male:2 female | 1 - all situated in the US                                         | No      | 10 MD, 2 Doctors of Osteopathy                                                                       |
| <b>Powers<br/>(2017)</b>    | Not reported | n/a | Unclear - Had to be part of the PFP Research Retreat - unclear how involvement was facilitated | unclear          | not reported (authors from USA, Belgium, Australia)                | Unclear | Unclear                                                                                              |

|                                      |                            |                                                                                  |                                                                                                                                 |                                                 |                                                                                                  |         |                                                                                                                                             |
|--------------------------------------|----------------------------|----------------------------------------------------------------------------------|---------------------------------------------------------------------------------------------------------------------------------|-------------------------------------------------|--------------------------------------------------------------------------------------------------|---------|---------------------------------------------------------------------------------------------------------------------------------------------|
| <b>Herring<br/>(2018)</b>            | 10                         | n/a                                                                              | <b>Yes* (see key)</b>                                                                                                           | 4 male:6<br>female                              | 2 - all situated in the<br>USA & Canada                                                          | No      | 8 MD, 2 Doctors of<br>Osteopathy                                                                                                            |
| <b>Van<br/>Middlekoop<br/>(2018)</b> | Unclear -<br>17<br>authors | n/a                                                                              | No - 'invited based on<br>scientific publications<br>or interest in the field'                                                  | Unclear -<br>authorship<br>8 male : 9<br>female | Unclear - authors<br>from Netherlands,<br>Australia, UK and<br>USA                               | No      | Physical Therapy;<br>Rheumatology;<br>Orthopaedics;<br>Radiology;<br>Epidemiology; Human<br>Movement Science;<br>General Health<br>Science  |
| <b>Collins<br/>(2018)</b>            | 41                         | n/a -<br>justification<br>that all were<br>active<br>researchers<br>in the field | No - had to be part of<br>the research retreat.<br>Unclear how panel<br>members were<br>selected down from<br>original numbers. | Unclear -<br>authorship<br>6 male : 6<br>female | Unclear - authors<br>from Australia,<br>Netherlands, UK,<br>Denmark, USA,<br>Canada, and Brazil. | Unclear | Physical Therapy;<br>Athletic Trainers;<br>Podiatrists;<br>Biomechanists;<br>Biomechanical<br>Engineering; and<br>Human Movement<br>Science |

|                            |    |     |                                                                                                                                                                                                                                                                                      |                      |                              |    |                                                  |
|----------------------------|----|-----|--------------------------------------------------------------------------------------------------------------------------------------------------------------------------------------------------------------------------------------------------------------------------------------|----------------------|------------------------------|----|--------------------------------------------------|
| <b>Huang<br/>(2018)</b>    | 15 | n/a | No                                                                                                                                                                                                                                                                                   | Unclear              | 1 - all situated in<br>China | No | Unclear                                          |
| <b>Fox (2018)</b>          | 17 | n/a | <b>Yes** (See key)</b>                                                                                                                                                                                                                                                               | 8 male: 9<br>female  | 1 - USA-only                 | No | 17 MDs (radiology<br>experts plus others)        |
| <b>Guanghua<br/>(2020)</b> | 30 | n/a | No                                                                                                                                                                                                                                                                                   | Unclear              | 1 - all situated in<br>China | No | unclear - specialties of<br>panel is not listed. |
| <b>Chahla<br/>(2020)</b>   | 28 | n/a | Experts had a clinical<br>practice that utilizes<br>cartilage restorative<br>procedures for the<br>patellofemoral joint<br>(minimum of 30<br>cartilage cases per<br>year), and had<br>frequently published<br>and/or lectured on the<br>topic (>10 publications<br>on patellofemoral | 26 male: 2<br>female | 2 – USA & Canada             | No | Surgeons-only                                    |

|                                                  |    |     |                                                                                                                                                                                             |                      |                                         |    |                                                                                                                       |
|--------------------------------------------------|----|-----|---------------------------------------------------------------------------------------------------------------------------------------------------------------------------------------------|----------------------|-----------------------------------------|----|-----------------------------------------------------------------------------------------------------------------------|
|                                                  |    |     | chondral injuries).<br>Experts were part of a<br>previously established<br>group (2016) of<br>osteochondral allograft<br>experts (MOCA<br>group).                                           |                      |                                         |    |                                                                                                                       |
| <b><i>Kolasinski</i></b><br><b><i>(2020)</i></b> | 15 | n/a | No. Expressions of<br>interest are invited by<br>the American College<br>of Rheumatology.<br><i>However, how panel<br/>were recruited and<br/>against what metrics is<br/>not reported.</i> | 8 male : 7<br>female | 2. USA & Canada                         | No | 10<br>Rheumatology/MDs; 1<br>Internist-MD; 1<br>Physical therapist; 1<br>Occupational therapist;<br><b>1 patient.</b> |
| <b><i>Keshmiri</i></b><br><b><i>(2021)</i></b>   | 13 | n/a | No. AGA ( <i>AGA not<br/>defined in the paper or</i>                                                                                                                                        | 12 male: 1<br>female | 3 – Germany, Austria<br>and Switzerland | No | Surgeons-only                                                                                                         |

|                          |                                    |                                                       |                                                                                                                                                                                                                                                                       |                             |                                                                    |                              |                                                                                                                                                  |
|--------------------------|------------------------------------|-------------------------------------------------------|-----------------------------------------------------------------------------------------------------------------------------------------------------------------------------------------------------------------------------------------------------------------------|-----------------------------|--------------------------------------------------------------------|------------------------------|--------------------------------------------------------------------------------------------------------------------------------------------------|
|                          |                                    |                                                       | <i>online</i> ) patellofemoral<br>committee members.                                                                                                                                                                                                                  |                             |                                                                    |                              |                                                                                                                                                  |
| <b>Kunene<br/>(2021)</b> | 19                                 | 5-10 years<br>=3; 11-20<br>years =10;<br>>20 years =6 | Yes. Clinicians who<br>were experienced in<br>working with runners<br>in marginalized<br>communities. The<br>participants had to<br>have at least 5 years of<br>experience in the<br>treatment and<br>rehabilitation of<br>running-related<br>injuries including PFP. | <b>10 female:</b><br>9 male | 2 - South Africa (15)<br>and UK (4)                                | No                           | Physician(3); Physical<br>therapist (6); Sports<br>Therapist (2);<br>Biokineticist (2);<br>Podiatrist (2);<br>Dietician (2);<br>Psychologist (2) |
| <b>Barton<br/>(2021)</b> | 24 (2015)<br>and then<br>51 (2019) | 24% of final<br>voting panel<br><4 years<br>clinical  | Yes. Must have been a<br>previous attendee of<br>the International PFP<br>research retreat.                                                                                                                                                                           | Unclear*                    | 10 countries<br>(Australia=7;<br>Brazil=7; Canada=3;<br>Denmark=3; | Yes - 1 member<br>from India | Multiple layers<br>Round 1:<br>Physiotherapists - 19;<br>Athletic Trainers - 1;                                                                  |

|                            |    |                                                        |                                           |         |                                                                        |    |                                                                                                                                                                                                                                |
|----------------------------|----|--------------------------------------------------------|-------------------------------------------|---------|------------------------------------------------------------------------|----|--------------------------------------------------------------------------------------------------------------------------------------------------------------------------------------------------------------------------------|
|                            |    | experience;<br>30% >16<br>years clinical<br>experience |                                           |         | India=1; Italy=2;<br>Kuwait=1; The<br>Netherlands=2;<br>UK=9; USA=16). |    | Sports MD - 2;<br>Biomechanist -1;<br>Other - 1.<br><br>Round 2-NA<br><br>Round 3 - 51<br>(Physiotherapists 26,<br>Athletic Trainers -7,<br>MD -2).<br><br>Final voting section<br>unclear on<br>professional<br>affiliations. |
| <b>Guanghua<br/>(2021)</b> | 35 | n/a                                                    | No - had to be an<br>orthopaedic 'expert' | Unclear | 1 – China-only                                                         | No | Orthopaedic-surgeon<br>specialists only                                                                                                                                                                                        |



|                             |                                                          |                                                               |                                                                                                                                                                                                                                                                                                                   |                                                                                                                                                                        |                                                                                                                                                                                                                                                                                                                                   |    |                                                                                                                                                                                                                                                                                                                                                                               |
|-----------------------------|----------------------------------------------------------|---------------------------------------------------------------|-------------------------------------------------------------------------------------------------------------------------------------------------------------------------------------------------------------------------------------------------------------------------------------------------------------------|------------------------------------------------------------------------------------------------------------------------------------------------------------------------|-----------------------------------------------------------------------------------------------------------------------------------------------------------------------------------------------------------------------------------------------------------------------------------------------------------------------------------|----|-------------------------------------------------------------------------------------------------------------------------------------------------------------------------------------------------------------------------------------------------------------------------------------------------------------------------------------------------------------------------------|
| <b>Vicenzino<br/>(2022)</b> | 71 = 35<br>for<br><b>survey</b><br>(plus 36<br>patients) | Involvement<br>with PFP<br>ranging from<br>0 to >16<br>years* | Yes - Experts were<br>identified through the<br>International<br>Patellofemoral<br>Research Network,<br><b>Defined</b><br>www.expertscape.com<br>, peer-reviewed<br>publications, and<br>screening abstract<br>submissions to the<br>2019 International<br>Patellofemoral<br>Research Retreat<br>(Milwaukee, WI). | <b>Survey:</b><br>healthcare<br>workers<br>N=35 (20<br>male:15<br>female);<br>and<br>patients (12<br>male:24<br>female)<br><b>In-person:</b><br>(11 male: 9<br>female) | 9 in health<br>professions survey<br>(Australia, Canada,<br>Spain, Brazil,<br>Denmark, Ireland,<br>Netherlands, UK and<br>USA)<br>4 patient survey<br>(78% UK, 11%<br>Denmark, 8%<br>Australia and 3%<br>Ireland)<br>8 at the in-person<br>process (Australia =<br>6; Brazil = 2;<br>Denmark = 1; Ireland<br>= 1; The Netherlands | No | Survey round:<br>Physiotherapists (12),<br>Athletic trainers(3),<br>Orthopaedic<br>Surgeon(3), Sports<br>Medicine MD(3),<br>Exercise Scientist (1),<br>Biomechanist(1),<br>Psychologist(1),<br>Radiologist(1),<br>Other1)<br><b>In-person:</b><br>Physiotherapists (12);<br>Athletic trainers (3);<br>Sports Medicine MD<br>(1); Exercise Scientist<br>(1); Biomechanist (1); |
|-----------------------------|----------------------------------------------------------|---------------------------------------------------------------|-------------------------------------------------------------------------------------------------------------------------------------------------------------------------------------------------------------------------------------------------------------------------------------------------------------------|------------------------------------------------------------------------------------------------------------------------------------------------------------------------|-----------------------------------------------------------------------------------------------------------------------------------------------------------------------------------------------------------------------------------------------------------------------------------------------------------------------------------|----|-------------------------------------------------------------------------------------------------------------------------------------------------------------------------------------------------------------------------------------------------------------------------------------------------------------------------------------------------------------------------------|

= 1; UK = 3; US = 5;

Psychologist (1);

Italy =1)

Other (1)

**Key:**

\*Panel is made up from 2 nominated representatives from each of American Academy of Family Physicians, American Academy of Orthopaedic Surgeons, ACSM, American Medical Society for Sports Medicine, American Orthopaedic Society for Sports Medicine and American Osteopathic Academy of Sports Medicine. Representatives are chosen by their organization based on their experience as team physicians with expertise in the topic area.

\*\* Available on American College of Radiology (ACR) website - "Following regulatory requirements, we survey panel members on their skills and expertise to ensure that panels include expertise in the clinical topic, primary care medicine, medical imaging, statistics, and clinical trial design. Panel members' expertise is determined using self-attestation and calculated by the amount of education, training, and experience the member reports for that skill area"

\*\*\*MD = Medical Doctor
