# Supplementary material for: Consensus methods in patellofemoral pain: how rigorous are they? A scoping review
Source: PubMed Central journal article supplement (PMC11228197; doi:10.1136/bjsports-2023-107552), 2024-05-22
Supplement: bjsports-2023-107552supp004.pdf [file bjsports-2023-107552supp004.pdf]

**Table 4. Methods used for measuring, and/or facilitating consensus among panelists.**

| <i>First Author</i>     | <i>What consensus method was reported?</i> | <i>Which method of consensus was used?</i>                                 | <i>Was consensus level decided a priori?</i> | <i>What was the method or level of agreement set at?</i>                                                                                                               | <i>Were dissenting opinions acknowledged and reported?</i> |
|-------------------------|--------------------------------------------|----------------------------------------------------------------------------|----------------------------------------------|------------------------------------------------------------------------------------------------------------------------------------------------------------------------|------------------------------------------------------------|
| <i>Herring (2008)</i>   | None                                       | Informal - iterative development over written rounds and in-person meeting | No                                           | Unanimous agreement amongst invited panel - assumed <i>not</i> measured                                                                                                | No                                                         |
| <i>Davis (2010)</i>     | None                                       | Consensus conference - informal                                            | No                                           | Unclear                                                                                                                                                                | No                                                         |
| <i>Powers (2012)</i>    | None                                       | Consensus conference - informal                                            | No                                           | Unclear                                                                                                                                                                | No                                                         |
| <i>Witvrouw (2014)</i>  | None                                       | Consensus conference - informal                                            | No                                           | Unclear                                                                                                                                                                | No                                                         |
| <i>McAlindon (2014)</i> | RAND-UCLA & Delphi                         | RAND-UCLA                                                                  | Yes                                          | RAND method (Median score of greater than 7 using a 9-point Likert, with less than 1/3 of panelists also not falling in the 1-3 range indicating a large disagreement) | yes - as part of the RAND-UCLA method                      |
| <i>Crossley (2016a)</i> | None                                       | Consensus conference - informal                                            | No                                           | Unclear                                                                                                                                                                | No                                                         |
| <i>Crossley (2016b)</i> | Unclear                                    | Voting - report "OARSI method" - assessed as                               | Yes                                          | Had to be rated 'appropriate' (7-9 on a 10-point Likert) on                                                                                                            | No                                                         |

|                              |                                                          | a modified version of RAND/UCLA                                             |                          | average (median) <i>AND</i> consistent with evidence                                   |                                                       |
|------------------------------|----------------------------------------------------------|-----------------------------------------------------------------------------|--------------------------|----------------------------------------------------------------------------------------|-------------------------------------------------------|
| <i>Herring (2016)</i>        | None                                                     | Informal - iterative development over written rounds and in-person meeting  | No                       | Unanimous agreement amongst invited panel - assumed <i>not</i> measured                | No                                                    |
| <i>Powers (2017)</i>         | None                                                     | Informal - not reported fully                                               | No                       | Unclear                                                                                | No                                                    |
| <i>Herring (2018)</i>        | None                                                     | Informal - iterative development over written rounds and in-person meeting  | No                       | Unanimous agreement amongst invited panel - assumed <i>not</i> measured                | No                                                    |
| <i>Van Middlekoop (2018)</i> | Numerical Rating Scale 0-10                              | Unclear - no report of consensus process NRS 0-10 used for priority setting | Yes                      | For priority setting part only, consensus was >7.5 out of 10 on numerical rating scale | No                                                    |
| <i>Collins (2018)</i>        | 10 point Likert scale - median score must be between 7-9 | Unclear - median level of agreement but also had to agree with evidence     | Yes - level of certainty | median agreement between 7-9                                                           | no - outliers were given on bar graphs, not discussed |
| <i>Huang (2018)</i>          | None                                                     | n/a                                                                         | Unclear                  | Unclear                                                                                | No                                                    |
| <i>Fox (2018)</i>            | RAND-UCLA                                                | RAND-UCLA                                                                   | Yes                      | median agreement between 7-9                                                           | not explicit but is part of RAND method               |
| <i>Guanghua (2020)</i>       | Delphi                                                   | Delphi - unclear whether also involved in-person round                      | Unclear                  | Unclear                                                                                | No                                                    |
| <i>Chahla (2020)</i>         | Delphi                                                   | Modified Delphi*                                                            | Yes                      | over 75% of respondents agreed and fewer than 20%                                      | No                                                    |

|                          |                               |                                                                                          |                 | disagreed in the final voting round                                                       |    |
|--------------------------|-------------------------------|------------------------------------------------------------------------------------------|-----------------|-------------------------------------------------------------------------------------------|----|
| <i>Kolasinski (2020)</i> | Unclear                       | Unclear - face to face voting over 2-days reported.                                      | Yes             | > 70% agreement                                                                           | No |
| <i>Keshmiri (2021)</i>   | Delphi                        | Modified Delphi                                                                          | No              | n/a – did not seek to measure consensus, just reported level of agreement with statements | No |
| <i>Kunene (2021)</i>     | Delphi                        | Modified - Delphi                                                                        | Yes             | > 70% agreement                                                                           | No |
| <i>Barton (2021)</i>     | Delphi                        | Modified Delphi mixed with Priority setting process (see earlier work of the same group) | Yes for stage 3 | > 70% agreement                                                                           | No |
| <i>Guanghua (2021)</i>   | Unclear                       | Unclear                                                                                  | Unclear         | Unclear                                                                                   | No |
| <i>Vicenzino (2022)</i>  | Survey plus in person meeting | Survey plus in person meeting                                                            | Yes             | > 70% agreement on survey and paper based votes (single round)                            | No |
